# Supplementary material
Source: MDPI journal article supplement (https://www.mdpi.com/search?q=minerals-10-00536)
Supplement: s001 [file minerals-10-00536-s001.pdf]

## Supplementary

**Figure S1.** Hydrothermal features, and selected Mn ore styles and Mn mineralized microbially induced sedimentary structures (MISS), Cape Vani Mn oxide deposit. A. Stringer Mn deposits. Mn mineralised barite( $\pm$ silica) veins stringer networks crosscut stratiform Mn ore, Mn nodules, bedded barite ore, and cross-bedded sandstone/sandy tuff host (Vani vein/Figure X). B. MISS type: Nodules. Loaf- to mound-shaped structures with nodular and cauliflower-like thrombolytic surface fabric (VA-05-16/Table S1). C. MISS type: Mat fragments and chips. Plan view of upper bedding surface of unmineralized sandstone/sandy tuff covered by large patches of millimeter-thick Mn crusts, with highly irregular outlines and embayments, crosscut by white smoker-type hydrothermal-exhalative barite (-silica) feeder veinlets (black arrows). Chisel is 21 cm long (SMO-05-10/Table S1). D. MISS type: Mat-Layer Structure. Upper bedding surface showing “mat layer structure.” Concentric rims with crenulated appearance and discoidal colony texture (dotted line) (VA-05-05/Table S1). E. MISS type: Upturned and Curled Margins. Cracks with upturned and curled margins on upper surface of fine-grained Mn sandstone/sandy tuff. Curved and upturned (involute) margin (arrow) of inferred fossil microbial mat consists of Mn-rich sandstone. Chisel in C is 21 cm (MI-04-27/Table S1). F. Mn sandstone/sandy tuff—chimney. Tubular cone possibly representing a white smoker structure, consisting of erratic and locally patchy amounts of Mn oxides and barite that cement epiclastic sandstone and sandy tuff; knolls of Mn oxide minerals are adhering to the outer surface and tip of cone [VA-05-06/Table S1]. Number of analysed sample/Table with mineralogical composition or Figure with EPR analysis.

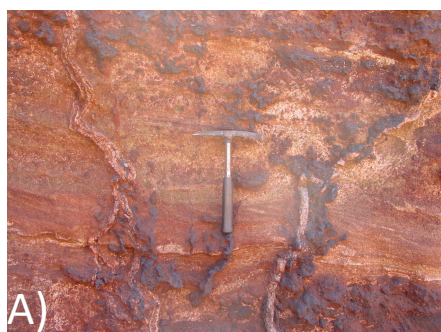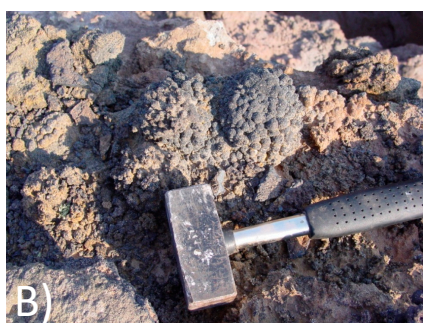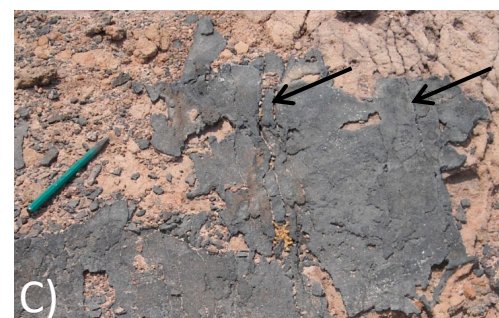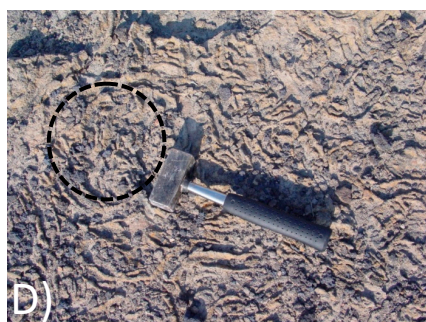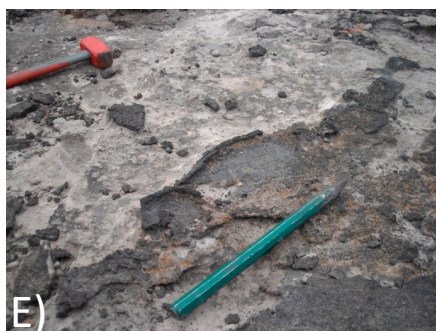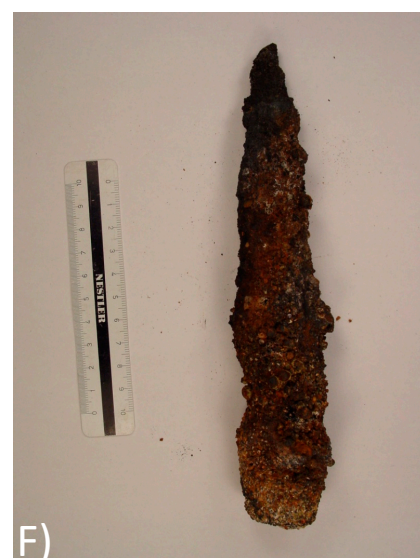

**Figure S2.** Representative X-ray powder diffraction pattern obtained for todorokite(T)-rich samples

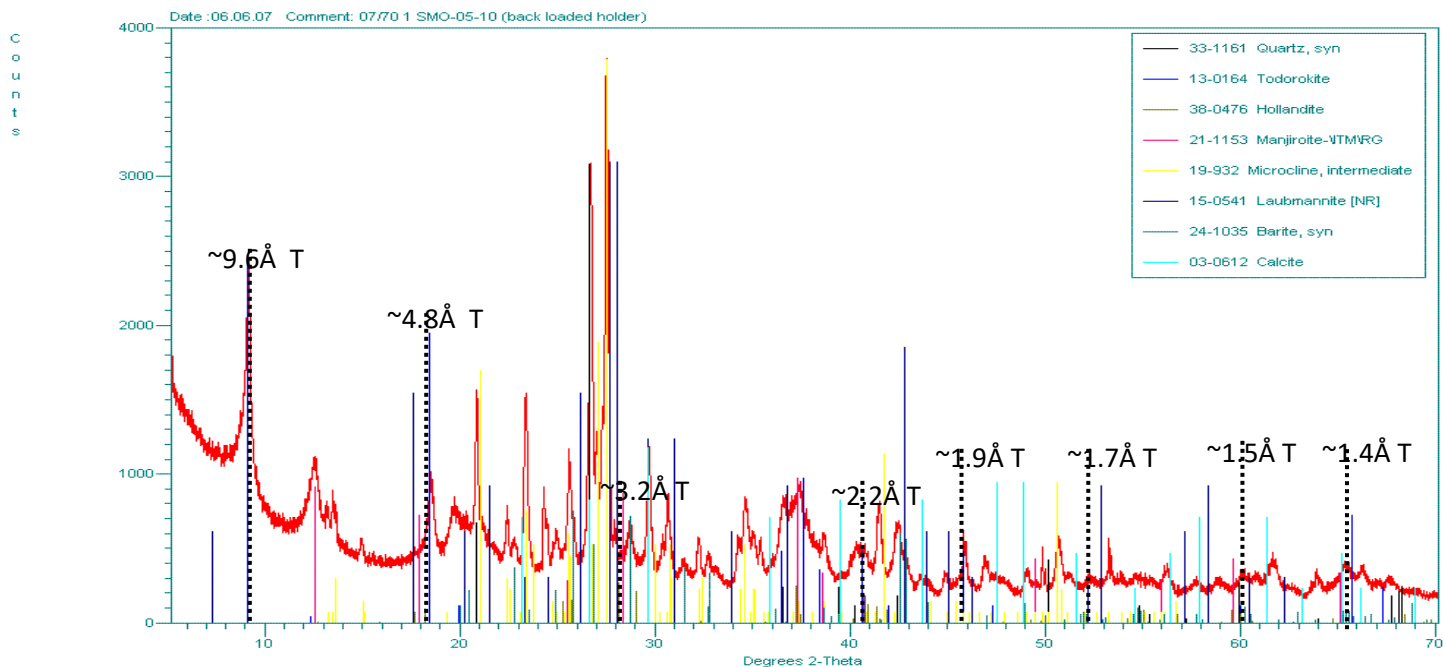

**Figure S3.** Representative X-ray powder diffraction patterns obtained for manjiroite (M)-rich samples [<http://webmineral.com/data/Manjiroite.shtml#.VWSoEkbHd5V>; [1]; <http://rruff.info/Manjiroite>]

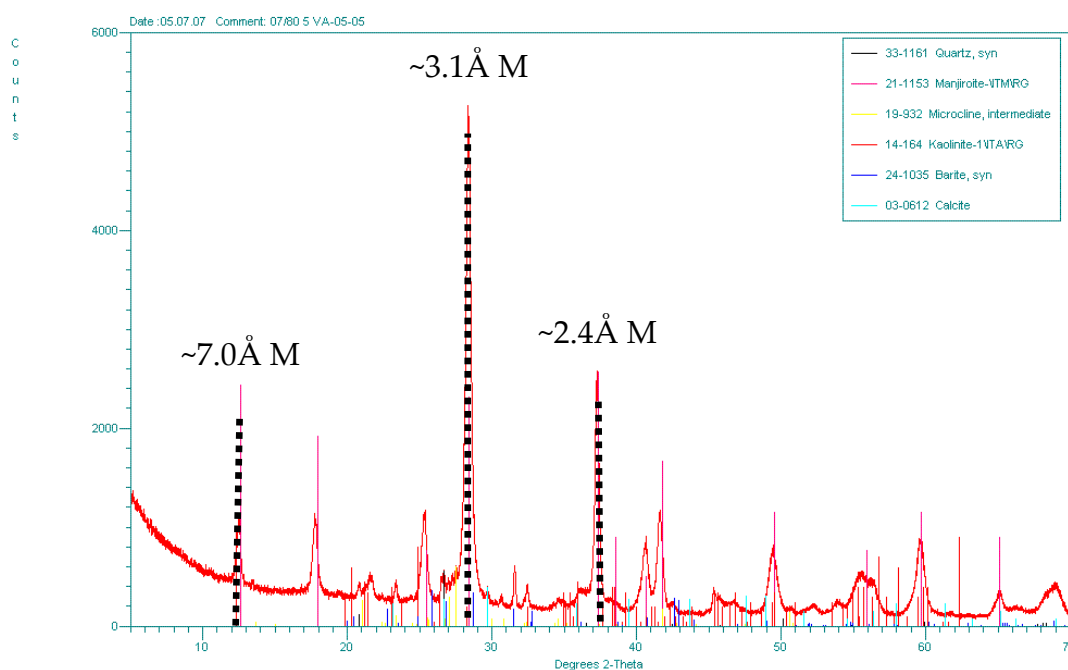

**Figure S4.** (a) SEM-backscattered electron (BSE) image of elongated fibres of crystalline todorokite ( $>5 \mu\text{m}$ ) intergrown within a platy todorokite matrix which cement K-feldspar microclasts (K); (b) FEG-SEM image of nanocrystalline todorokite in the form of fibrous needles ( $<0.4 \mu\text{m}$ ) intergrown within a platy Mn oxide matrix; these fibres appear to be aggregated into a dense network of fibres displaying a plate-like growth morphology which is characteristic of synthetic todorokite transformed from birnessite [2].

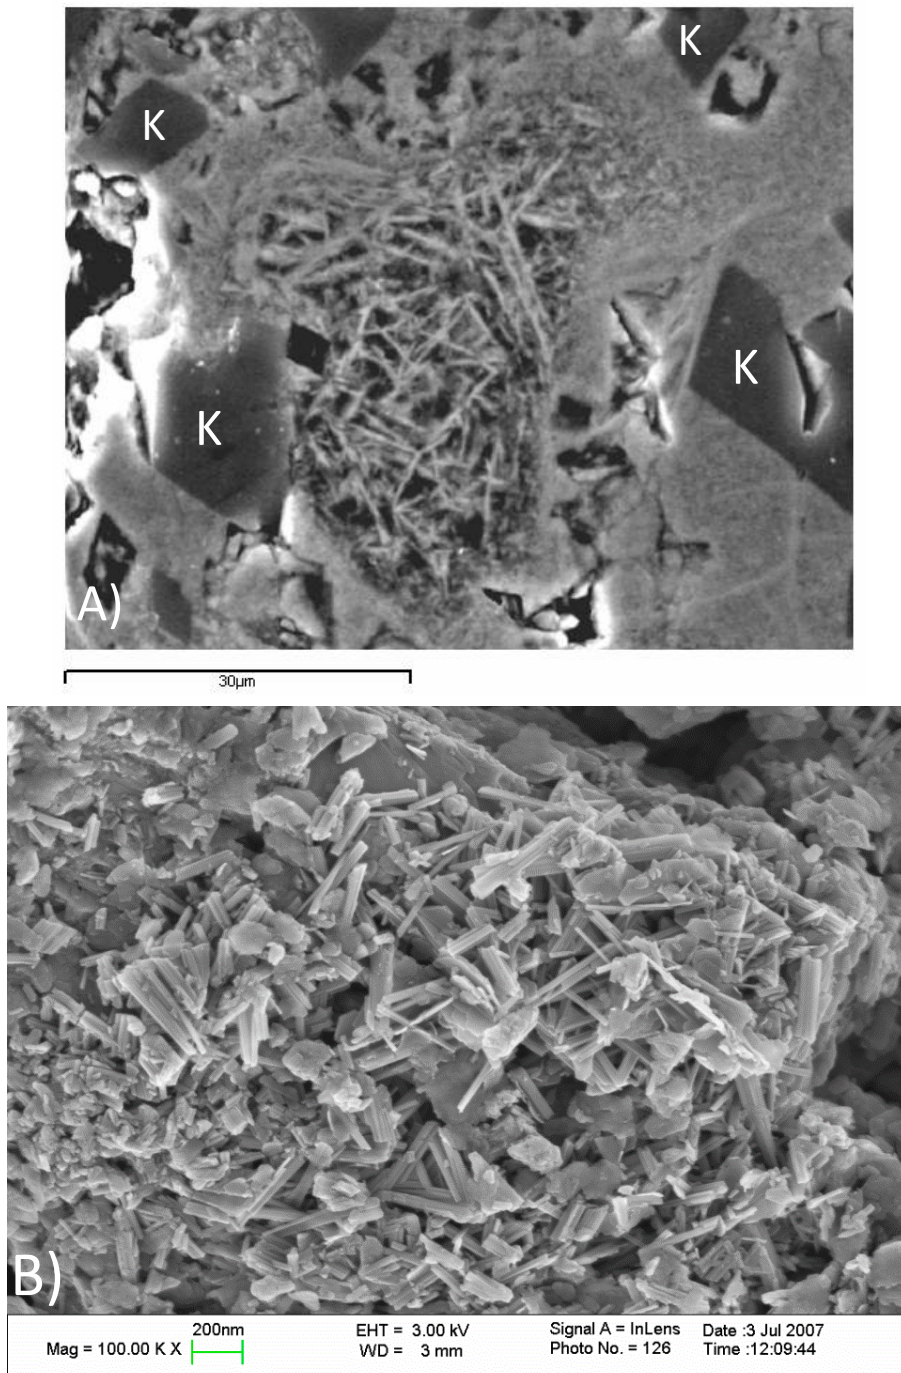



Figure S5. FEG-SEM EDS image and elemental maps of todorokite nanoplatelets. Image scale bar is 500 nm.

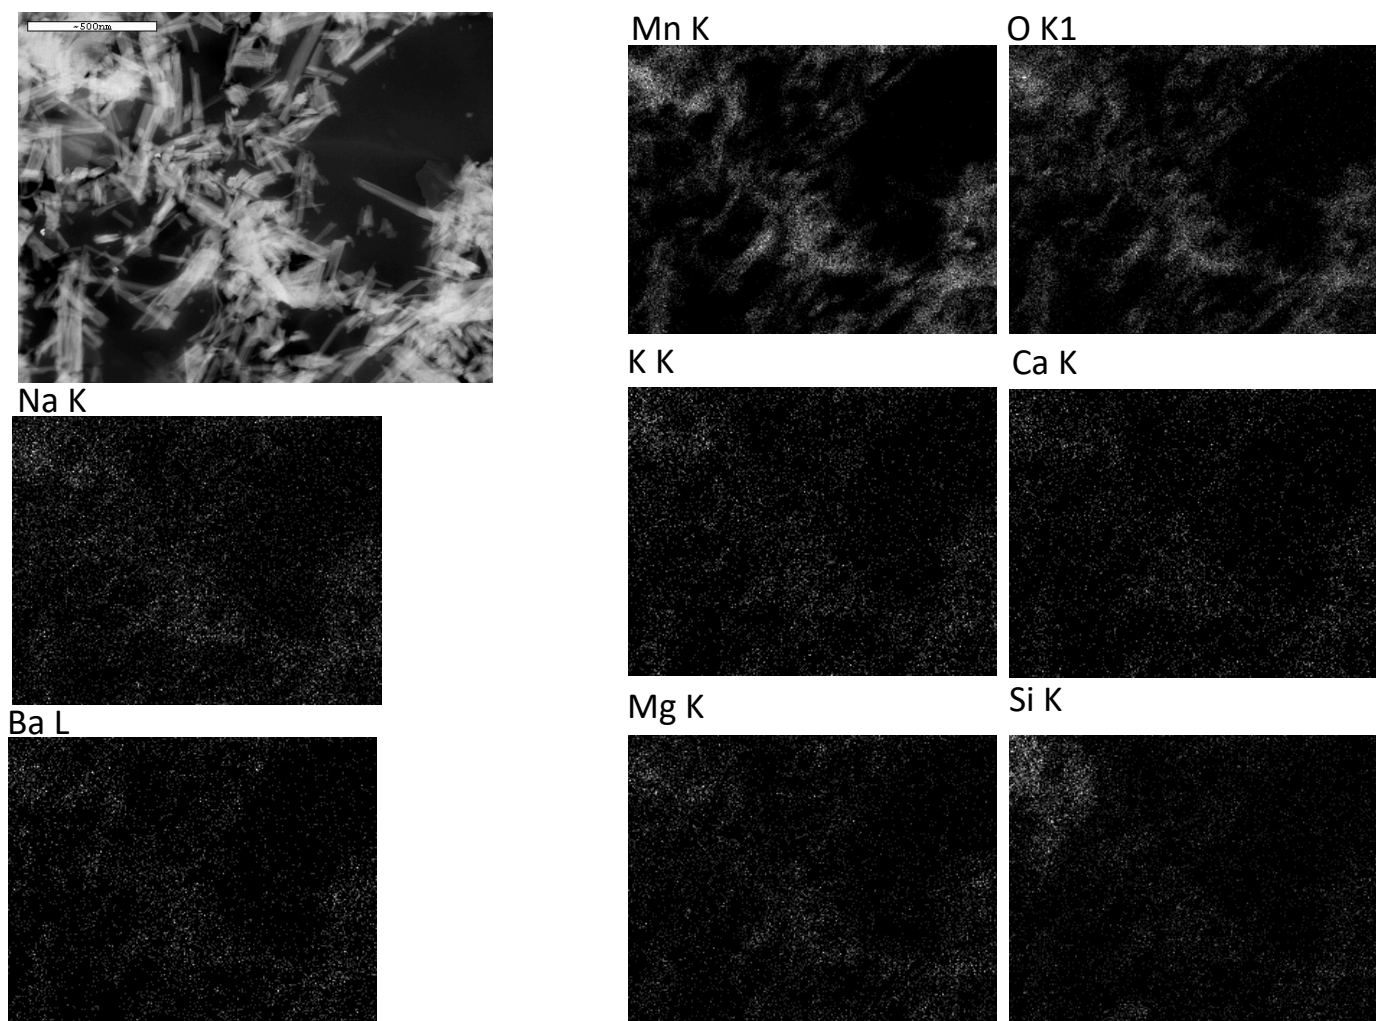

| <b>Sample</b>    | <b>Mineralogy</b>                                                         | <b>Ore type/MnMISS type*</b>                                  |
|------------------|---------------------------------------------------------------------------|---------------------------------------------------------------|
| <b>SMO-05-09</b> | Hollandite, todorokite, manjiroite, K-feldspar, barite, quartz, illite    | Stratiform Mn/growth bedding structures                       |
| <b>SMO-05-05</b> | Hollandite, K-feldspar, barite, quartz                                    | Stratiform Mn/growth bedding structures                       |
| <b>SMO-05-10</b> | Todorokite, K-feldspar, hollandite, manjiroite, barite, laubmannite(?)    | Mn sandstone/sandy tuff/mat fragments and chips               |
| <b>VA-05-05</b>  | Manjiroite, K-feldspar, barite, quartz, kaolinite                         | Mn crusts/mat-layer structure                                 |
| <b>VA-05-06</b>  | Todorokite, manjiroite, hollandite, K-feldspar, quartz, illite, kaolinite | Mn sandstone/sandy tuff/Chimney                               |
| <b>VA-05-10</b>  | Todorokite, manjiroite, K-feldspar, quartz laubmannite(?)                 | Mn sandstone/sandy tuff/growth bedding structures             |
| <b>VA-05-16</b>  | Todorokite, hollandite, K-feldspar, quartz, barite, kaolinite             | Mn crusts/Mn nodules                                          |
| <b>MI-04-27</b>  | Hollandite, todorokite, K-feldspar, manjiroite, quartz, barite            | Mn crusts/upturned-curved margins                             |
| <b>MI-04-36</b>  | Hollandite, todorokite, , K-feldspar, quartz, barite, kaolinite           | Mn crusts/Fossil gas domes                                    |
| <b>clastic</b>   | Todorokite, K-feldspar, hollandite, manjiroite, barite, laubmannite(?)    | Mn sandstone/sandy tuff/growth bedding structures and nodules |

**Table S1.** Powder X-ray diffraction mineralogy of various Ore/MnMISS types

\*Kilias (2012) [3]

**Table S2.** SEM-EDX spot analyses of crystalline todorokite (Figure S4B). Values in weight %.

| Sample           | Na <sub>2</sub> O | MgO  | SiO <sub>2</sub> | K <sub>2</sub> O | CaO  | MnO(MnO <sub>2</sub> ) | ZnO  | Cl <sub>2</sub> O | BaO  | Al <sub>2</sub> O <sub>3</sub> |
|------------------|-------------------|------|------------------|------------------|------|------------------------|------|-------------------|------|--------------------------------|
| <b>SMO-05-10</b> |                   |      |                  |                  |      |                        |      |                   |      |                                |
| Analysis 1       | 3.1               | 3.33 | 0.26             | 0.88             | 0.82 | 67.68(82.84)           |      |                   | 2.43 |                                |
| Analysis 2       | 2.39              | 3.16 |                  | 0.73             | 0.74 | 67.54(82.77)           |      |                   | 2.49 |                                |
| Analysis 7       | 1.56              | 1.77 |                  | 0.73             | 0.56 | 64.60(79.16)           | 1.03 |                   | 2.92 |                                |
| Analysis 8       | 2.02              | 3.11 |                  | 0.93             | 0.92 | 65.83(80.67)           | 0.94 |                   | 2.73 |                                |
| Analysis 9       | 2.77              | 2.73 |                  | 0.83             | 0.75 | 65.70(80.51)           |      | 0.33              | 2.13 |                                |
| Analysis 10      | 2.01              | 2.32 | 0.52             | 0.75             | 0.59 | 60.68(74.36)           |      | 0.29              | 2.79 | 0.5                            |
| Analysis 11      | 2.71              | 2.53 | 2.43             | 1.11             | 0.74 | 65.29(80.01)           | 0.94 |                   | 2.26 | 1.16                           |
| Analysis 12      | 2.4               | 2.79 | 0.49             | 0.82             | 0.86 | 65.77(80.60)           | 1.3  | 0.35              | 2.88 | 0.66                           |
| Analysis 15      | 1.72              | 2.42 | 0.26             | 0.67             | 1.01 | 62.44(76.51)           | 1.0  |                   | 2.48 | 0.57                           |

## References

1. Gutzmer, J.; Beukes, N.J. Asbestiform manjiroite and todorokite from the Kalahari manganese field, South Africa. *South African J. Geol.* **2000**, *103*, 163-174.
2. Atkins, A.L.; Shaw, S.; Peacock, C.L. Nucleation and growth of todorokite from birnessite: Implications for trace-metal cycling in marine sediments. *Geochim. Cosmochim. Acta* **2014**, *144*, 109-125.
3. Kiliyas, S.P. Microbial Mat-Related Structures in the Quaternary Cape Vani Manganese-Oxide (-Barite) Deposit, NW Milos Island, Greece. In *Microbial Mats in Siliciclastic Depositional Systems through Time*; SEPM Special Publication: Athen, Greece, **2012**; Volume 101, pp. 97-110.
